# Supplementary material for: Monitoring of carbon-water fluxes at Eurasian meteorological stations using random forest and remote sensing
Source: Springer Nature journal article supplement (doi:10.1038/s41597-023-02473-9), 2023-09-07
Supplement: 41597_2023_2473_MOESM1_ESM.pdf [file 41597_2023_2473_MOESM1_ESM.pdf]

## Supplementary Information for “Monitoring of carbon-water fluxes at Eurasian meteorological stations using random forest and remote sensing”

Mingjuan Xie, Xiaofei Ma, Yuangang Wang, Chaofan Li, Haiyang Shi, Xiuliang Yuan, Olaf Hellwich, Chunbo Chen, Wenqiang Zhang, Chen Zhang, Qing Ling, Ruixiang Gao, Yu Zhang, Friday Uchenna Ochege, Amaury Frankl, Philippe De Maeyer, Nina Buchmann, Iris Feigenwinter, Jørgen E. Olesen, Radoslaw Juszczak, Adrien Jacotot, Aino Korrensalo, Andrea Pitacco, Andrej Varlagin, Ankit Shekhar, Annalea Lohila, Arnaud Carrara, Aurore Brut, Bart Kruijt, Benjamin Loubet, Bernard Heinesch, Bogdan Chojnicki, Carole Helfter, Caroline Vincke, Changliang Shao, Christian Bernhofer, Christian Brümmer, Christian Wille, Eeva-Stiina Tuittila, Eiko Nemitz, Franco Meggio, Gang Dong, Gary Lanigan, Georg Niedrist, Georg Wohlfahrt, Guoyi Zhou, Ignacio Goded, Thomas Gruenwald, Janusz Olejnik, Joachim Jansen, Johan Neiryneck, Juha-Pekka Tuovinen, Junhui Zhang, Katja KLUMPP, Kim Pilegaard, Ladislav Šigut, Leif Klemedtsson, Luca Tezza, Lukas Hörtnagl, Marek Urbaniak, Marilyn Roland, Marius Schmidt, Mark A. Sutton, Markus Hehn, Matthew Saunders, Matthias Mauder, Mika Aurela, Mika Korhikoski, Mingyuan Du, Nadia Vendrame, Natalia Kowalska, Paul G. Leahy, Pavel Alekseychik, Peili Shi, Per Weslien, Shiping Chen, Silvano Fares, Thomas Friborg, Tiphaine Tallec, Tomomichi Kato, Torsten Sachs, Trofim Maximov, Umberto Morra di Cella, Uta Moderow, Yingnian Li, Yongtao He, Yoshiko Kosugi and Geping Luo

### Contents

| Name     | Page number |
|----------|-------------|
| Table S1 | 1           |
| Table S2 | 2           |
| Table S3 | 3           |
| Table S4 | 4           |
| Table S5 | 5           |
| Table S6 | 5           |
| Fig. S1  | 6           |
| Fig. S2  | 7           |
| Fig. S3  | 7           |

**Table S1.** Variables affecting carbon-water fluxes.

| Variable        | Description (units)                                     | SR    | TR    | Data source                                                                                                                                                                                                                                                                                                                                                                                                                                                                                                                                                                                   |
|-----------------|---------------------------------------------------------|-------|-------|-----------------------------------------------------------------------------------------------------------------------------------------------------------------------------------------------------------------------------------------------------------------------------------------------------------------------------------------------------------------------------------------------------------------------------------------------------------------------------------------------------------------------------------------------------------------------------------------------|
| Lon             | Longitude (°)                                           | Point | Daily | Extracted from observation datasets for each flux station ( <a href="http://data.tpc.ac.cn">http://data.tpc.ac.cn</a> ; <a href="http://www.europe-fluxdata.eu/home">http://www.europe-fluxdata.eu/home</a> ; <a href="https://fluxnet.org">https://fluxnet.org</a> ) and meteorological station ( <a href="https://www.ncei.noaa.gov/metadata/geoportal/rest/metadata/item/gov.noaa.ncdc%3AC00516/html#">https://www.ncei.noaa.gov/metadata/geoportal/rest/metadata/item/gov.noaa.ncdc%3AC00516/html#</a> ). Data collected at 10-min or 30-min intervals were converted into a daily-scale. |
| Lat             | Latitude (°)                                            | Point | Daily |                                                                                                                                                                                                                                                                                                                                                                                                                                                                                                                                                                                               |
| DOY             | Day of the year (-)                                     | Point | Daily |                                                                                                                                                                                                                                                                                                                                                                                                                                                                                                                                                                                               |
| Tmax            | Daily maximum temperature (°C)                          | Point | Daily |                                                                                                                                                                                                                                                                                                                                                                                                                                                                                                                                                                                               |
| Tmin            | Daily minimum temperature (°C)                          | Point | Daily |                                                                                                                                                                                                                                                                                                                                                                                                                                                                                                                                                                                               |
| Tmean           | Daily average temperature (°C)                          | Point | Daily |                                                                                                                                                                                                                                                                                                                                                                                                                                                                                                                                                                                               |
| DTR             | Diurnal temperature range (°C)                          | Point | Daily |                                                                                                                                                                                                                                                                                                                                                                                                                                                                                                                                                                                               |
| Prcp            | Precipitation (mm)                                      | Point | Daily |                                                                                                                                                                                                                                                                                                                                                                                                                                                                                                                                                                                               |
| WS              | Wind speed (m/s)                                        | Point | Daily |                                                                                                                                                                                                                                                                                                                                                                                                                                                                                                                                                                                               |
| VPD             | Vapour pressure deficit (hPa)                           | Point | Daily |                                                                                                                                                                                                                                                                                                                                                                                                                                                                                                                                                                                               |
| DSR             | Downward shortwave radiation (W/m <sup>2</sup> )        | Point | Daily | Extracted from datasets in National Tibetan Plateau Data Center to each meteorological station during 1983-2018 <sup>1,2</sup> .                                                                                                                                                                                                                                                                                                                                                                                                                                                              |
|                 |                                                         | 0.1°  | Daily |                                                                                                                                                                                                                                                                                                                                                                                                                                                                                                                                                                                               |
| FPAR            | Fraction of the photosynthetically active radiation (-) | 0.05° | Daily | Extracted from datasets in GLASS to each meteorological station during 2002-2020 <sup>3</sup> .                                                                                                                                                                                                                                                                                                                                                                                                                                                                                               |
|                 |                                                         | 500m  | 4-Day |                                                                                                                                                                                                                                                                                                                                                                                                                                                                                                                                                                                               |
| EVI             | Enhanced vegetation index (-)                           | 500m  | Daily | Calculated using MOD09GA version 6 <sup>5</sup> .                                                                                                                                                                                                                                                                                                                                                                                                                                                                                                                                             |
| LSWI            | Land surface water index (-)                            | 500m  | Daily |                                                                                                                                                                                                                                                                                                                                                                                                                                                                                                                                                                                               |
| SR <sub>1</sub> | Surface reflectance for band 1 (-)                      | 500m  | Daily |                                                                                                                                                                                                                                                                                                                                                                                                                                                                                                                                                                                               |
| SR <sub>2</sub> | Surface reflectance for band 2 (-)                      | 500m  | Daily |                                                                                                                                                                                                                                                                                                                                                                                                                                                                                                                                                                                               |
| SR <sub>3</sub> | Surface reflectance for band 3 (-)                      | 500m  | Daily |                                                                                                                                                                                                                                                                                                                                                                                                                                                                                                                                                                                               |
| SR <sub>4</sub> | Surface reflectance for band 4 (-)                      | 500m  | Daily |                                                                                                                                                                                                                                                                                                                                                                                                                                                                                                                                                                                               |
| SR <sub>5</sub> | Surface reflectance for band 5 (-)                      | 500m  | Daily |                                                                                                                                                                                                                                                                                                                                                                                                                                                                                                                                                                                               |
| SR <sub>6</sub> | Surface reflectance for band 6 (-)                      | 500m  | Daily |                                                                                                                                                                                                                                                                                                                                                                                                                                                                                                                                                                                               |
| SR <sub>7</sub> | Surface reflectance for band 7 (-)                      | 500m  | Daily |                                                                                                                                                                                                                                                                                                                                                                                                                                                                                                                                                                                               |
| Elevation       | Elevation at each station (m)                           | 90m   | -     | Calculated using MERIT DEM <sup>6</sup> .                                                                                                                                                                                                                                                                                                                                                                                                                                                                                                                                                     |
| Aspect          | Aspect at each station (°)                              | 90m   | -     |                                                                                                                                                                                                                                                                                                                                                                                                                                                                                                                                                                                               |
| Slope           | Slope at each station (°)                               | 90m   | -     |                                                                                                                                                                                                                                                                                                                                                                                                                                                                                                                                                                                               |
| Sand            | Percentage of sand (%)                                  | 800m  | -     | Extracted using HWSO version 1.2 <sup>7</sup> .                                                                                                                                                                                                                                                                                                                                                                                                                                                                                                                                               |
| Silt            | Percentage of silt (%)                                  | 800m  | -     |                                                                                                                                                                                                                                                                                                                                                                                                                                                                                                                                                                                               |
| Clay            | Percentage of clay (%)                                  | 800m  | -     |                                                                                                                                                                                                                                                                                                                                                                                                                                                                                                                                                                                               |

SR, spatial resolution; TR, temporal resolution; GLASS, the Global Land Surface Satellite Product.  $EVI=2.5 * (\rho_{NIR} - \rho_R)/(\rho_{NIR} + 6 * \rho_R - 7.5 * \rho_B + 1)$ , where  $\rho_{NIR}$ ,  $\rho_R$  and  $\rho_B$  are the surface reflectance values of near infrared band, red band and blue band, respectively.

$LSWI=(\rho_{NIR} - \rho_{SWIR6})/(\rho_{NIR} + \rho_{SWIR6})$ , where  $\rho_{NIR}$  and  $\rho_{SWIR6}$  are the surface reflectance

values of near infrared band and shortwave infrared for band 6 (SWIR6: 1628 – 1652nm), respectively.

**Table S2.** Hyperparameter settings of random forest models (RFM) for the carbon-water flux simulation.

| Models  | Categories | Hyperparameters            |                         |                            |                                |
|---------|------------|----------------------------|-------------------------|----------------------------|--------------------------------|
|         |            | n_estimators<br>(RS   WRS) | max_depth<br>(RS   WRS) | max_features<br>(RS   WRS) | min_samples_leaf<br>(RS   WRS) |
| RFM-NEE | Overall    | 188   424                  | 29   27                 | 4   3                      | 6   2                          |
|         | Asia       | 416   180                  | 13   22                 | 9   10                     | 3   3                          |
|         | Europe     | 355   216                  | 20   29                 | 5   5                      | 27   29                        |
|         | Arid       | 188   424                  | 29   27                 | 4   3                      | 6   2                          |
|         | Non-arid   | 188   424                  | 29   27                 | 4   3                      | 6   2                          |
|         | Wetland    | 416   424                  | 13   27                 | 9   3                      | 3   2                          |
|         | Cropland   | 373   216                  | 13   29                 | 6   5                      | 28   29                        |
|         | Grassland  | 175   451                  | 25   27                 | 12   5                     | 19   15                        |
|         | Forest     | 156   424                  | 25   27                 | 7   3                      | 20   2                         |
| RFM-WF  | Overall    | 329   349                  | 25   21                 | 12   10                    | 21   8                         |
|         | Asia       | 188   424                  | 29   27                 | 4   3                      | 6   2                          |
|         | Europe     | 416   277                  | 13   22                 | 9   7                      | 3   28                         |
|         | Arid       | 188   180                  | 29   22                 | 4   10                     | 6   3                          |
|         | Non-arid   | 371   163                  | 17   14                 | 9   6                      | 19   28                        |
|         | Wetland    | 413   180                  | 18   22                 | 18   10                    | 6   3                          |
|         | Cropland   | 416   424                  | 13   27                 | 9   3                      | 3   2                          |
|         | Grassland  | 416   424                  | 13   27                 | 9   3                      | 3   2                          |
|         | Forest     | 216   413                  | 29   18                 | 21   11                    | 29   18                        |

NEE, net ecosystem carbon dioxide exchange; WF, water flux; n\_estimators, the number of decision trees; max\_depth, the maximum depth of the tree; max\_features, the number of features to consider when looking for the best split; min\_samples\_leaf, the minimum number of samples required to be at a leaf node. RS (remote sensing), representing that RS variables were used in random forest models (RFM) construction. WRS (without remote sensing), representing that RS variables were not used in RFM construction. RS variables include the fraction of the photosynthetically active radiation, enhanced vegetation index, land surface water index and surface reflectance for the Moderate Resolution Imaging Spectroradiometer bands 1–7.

**Table S3.** The mean value of performance indicators on test set in 10-time 10-fold CVs to evaluate the efficacy of carbon-water flux simulation models (random forest models, RFM).

| Models  | Categories | N      | R <sup>2</sup> (STD) | R <sup>2</sup> (STD) | RMSE (STD)  | RMSE (STD)  |
|---------|------------|--------|----------------------|----------------------|-------------|-------------|
|         |            |        | (RS)                 | (WRS)                | (RS)        | (WRS)       |
| RFM-NEE | Overall    | 200965 | 0.37 (0.09)          | 0.28 (0.08)          | 0.89 (0.29) | 0.95 (0.29) |
|         | Asia       | 28197  | 0.44 (0.19)          | 0.36 (0.19)          | 1.23 (0.42) | 1.34 (0.43) |
|         | Europe     | 172768 | 0.35 (0.09)          | 0.24 (0.07)          | 0.80 (0.29) | 0.87 (0.29) |
|         | Arid       | 30667  | 0.39 (0.19)          | 0.27 (0.18)          | 0.89 (0.50) | 0.96 (0.55) |
|         | Non-arid   | 170298 | 0.35 (0.10)          | 0.28 (0.09)          | 0.90 (0.27) | 0.95 (0.27) |
|         | Wetland    | 12932  | 0.32 (0.23)          | 0.27 (0.18)          | 1.38 (1.08) | 1.31 (1.03) |
|         | Cropland   | 29063  | 0.45 (0.14)          | 0.28 (0.11)          | 1.05 (0.53) | 1.17 (0.50) |
|         | Grassland  | 57688  | 0.37 (0.09)          | 0.31 (0.10)          | 0.64 (0.17) | 0.67 (0.19) |
|         | Forest     | 93999  | 0.39 (0.12)          | 0.33 (0.12)          | 0.91 (0.40) | 0.96 (0.40) |
| RFM-WF  | Overall    | 200965 | 0.67 (0.07)          | 0.61 (0.09)          | 0.74 (0.10) | 0.80 (0.12) |
|         | Asia       | 28197  | 0.69 (0.20)          | 0.64 (0.23)          | 0.89 (0.37) | 1.00 (0.42) |
|         | Europe     | 172768 | 0.67 (0.07)          | 0.63 (0.08)          | 0.70 (0.07) | 0.73 (0.08) |
|         | Arid       | 30667  | 0.68 (0.17)          | 0.61 (0.22)          | 0.83 (0.32) | 0.90 (0.35) |
|         | Non-arid   | 170298 | 0.67 (0.07)          | 0.64 (0.08)          | 0.71 (0.07) | 0.75 (0.08) |
|         | Wetland    | 12932  | 0.78 (0.11)          | 0.78 (0.11)          | 0.71 (0.42) | 0.70 (0.42) |
|         | Cropland   | 29063  | 0.66 (0.09)          | 0.61 (0.13)          | 0.77 (0.12) | 0.83 (0.12) |
|         | Grassland  | 57688  | 0.79 (0.07)          | 0.74 (0.09)          | 0.59 (0.08) | 0.66 (0.09) |
|         | Forest     | 93999  | 0.58 (0.11)          | 0.56 (0.14)          | 0.81 (0.15) | 0.83 (0.16) |

NEE, net ecosystem carbon dioxide exchange; WF, water flux; R<sup>2</sup>, determination coefficient; RMSE, root mean square error; STD, Standard Deviation; N, number of samples.

**Table S4.** The distribution of maximum  $R^2$  at each flux station in 10-time 10-fold CVs.

| Fluxes | Categories | N   | Prec. ( $R^2 < 0.5$ ) | Prec. ( $0.5 \leq R^2 < 0.7$ ) | Prec. ( $R^2 \geq 0.7$ ) |
|--------|------------|-----|-----------------------|--------------------------------|--------------------------|
|        |            |     | (RS   WRS)            | (RS   WRS)                     | (RS   WRS)               |
| NEE    | Overall    | 156 | 51.9%   60.9%         | 30.8%   32.7%                  | 17.3%   6.4%             |
|        | Asia       | 30  | 43.3%   53.3%         | 43.4%   36.7%                  | 13.3%   10.0%            |
|        | Europe     | 126 | 59.5%   64.3%         | 23.8%   30.9%                  | 16.7%   4.8%             |
|        | Arid       | 28  | 53.6%   67.9%         | 32.1%   25.0%                  | 14.3%   7.1%             |
|        | Non-arid   | 128 | 53.1%   60.9%         | 30.5%   33.6%                  | 16.4%   5.5%             |
|        | Wetland    | 16  | 56.2%   68.7%         | 12.5%   31.3%                  | 31.3%   0%               |
|        | Cropland   | 23  | 43.5%   82.6%         | 43.5%   8.7%                   | 13.0%   8.7%             |
|        | Grassland  | 47  | 51.1%   70.2%         | 40.4%   23.4%                  | 8.5%   6.4%              |
|        | Forest     | 64  | 42.2%   43.7%         | 34.4%   37.5%                  | 23.4%   18.8%            |
|        | Total      | 156 | 39.1%   53.8%         | 40.4%   32.7%                  | 20.5%   13.5%            |
| WF     | Overall    | 156 | 10.9%   13.5%         | 23.1%   26.3%                  | 66.0%   60.2%            |
|        | Asia       | 30  | 13.4%   10.0%         | 23.3%   30.0%                  | 63.3%   60.0%            |
|        | Europe     | 126 | 12.7%   13.5%         | 20.6%   24.6%                  | 66.7%   61.9%            |
|        | Arid       | 28  | 25.0%   25.0%         | 7.1%   17.9%                   | 67.9%   57.1%            |
|        | Non-arid   | 128 | 8.6%   10.9%          | 25.8%   28.9%                  | 65.6%   60.2%            |
|        | Wetland    | 16  | 6.2%   0%             | 6.3%   12.5%                   | 87.5%   87.5%            |
|        | Cropland   | 23  | 4.4%   13.0%          | 47.8%   52.2%                  | 47.8%   34.8%            |
|        | Grassland  | 47  | 4.3%   6.4%           | 19.1%   25.5%                  | 76.6%   68.1%            |
|        | Forest     | 64  | 20.3%   20.3%         | 17.1%   15.6%                  | 62.5%   64.1%            |
|        | Total      | 156 | 10.3%   11.5%         | 20.5%   21.8%                  | 69.2%   66.7%            |

Prec., percentage of flux station; N, number of flux stations;  $R^2$ , determination coefficient; Total, the maximum  $R^2$  for each flux station was selected for counting under 9 categories.

**Table S5.** The distribution of maximum  $R^2$  predicted by  $R^2$  simulation model (RSM) at the meteorological stations.

| Fluxes | Categories | N           | Prec. ( $R^2 < 0.5$ ) | Prec. ( $0.5 \leq R^2 < 0.7$ ) | Prec. ( $R^2 \geq 0.7$ ) |
|--------|------------|-------------|-----------------------|--------------------------------|--------------------------|
|        |            | (RS   WRS)  | (RS   WRS)            | (RS   WRS)                     | (RS   WRS)               |
| NEE    | Overall    | 4466   6849 | 59.5%   83.4%         | 35.4%   11.5%                  | 5.1%   5.1%              |
|        | Asia       | 1947   3422 | 41.7%   59.0%         | 15.5%   19.7%                  | 42.8%   21.3%            |
|        | Europe     | 2519   3427 | 63.4%   94.2%         | 30.6%   5.5%                   | 6.0%   0.3%              |
|        | Arid       | 1228   2148 | 58.6%   48.6%         | 5.5%   16.2%                   | 35.9%   35.2%            |
|        | Non-arid   | 3238   4701 | 53.2%   89.5%         | 35.6%   10.0%                  | 11.2%   0.5%             |
|        | Wetland    | 55   77     | 40.0%   68.8%         | 5.5%   9.1%                    | 54.5%   22.1%            |
|        | Cropland   | 1035   1294 | 72.9%   42.4%         | 12.3%   19.2%                  | 14.8%   38.4%            |
|        | Grassland  | 1996   2775 | 35.7%   40.5%         | 30.3%   23.9%                  | 34.0%   35.6%            |
|        | Forest     | 287   444   | 19.5%   46.2%         | 49.8%   39.2%                  | 30.7%   14.6%            |
|        | Total      | 4466   6849 | 15.5%   31.8%         | 35.8%   28.1%                  | 48.7%   40.1%            |
| WF     | Overall    | 4466   6849 | 10.2%   22.4%         | 22.6%   46.7%                  | 67.2%   30.9%            |
|        | Asia       | 1947   3422 | 25.9%   42.5%         | 23.7%   28.2%                  | 50.4%   29.3%            |
|        | Europe     | 2519   3427 | 3.8%   9.5%           | 20.1%   39.1%                  | 76.1%   51.4%            |
|        | Arid       | 1228   2148 | 18.8%   26.1%         | 7.5%   14.1%                   | 73.7%   59.8%            |
|        | Non-arid   | 3238   4701 | 8.0%   10.7%          | 31.0%   49.1%                  | 61.0%   40.2%            |
|        | Wetland    | 55   77     | 47.3%   42.9%         | 16.3%   5.2%                   | 36.4%   51.9%            |
|        | Cropland   | 1035   1294 | 23.3%   24.3%         | 12.1%   25.2%                  | 64.6%   50.5%            |
|        | Grassland  | 1996   2775 | 1.5%   5.4%           | 5.4%   14.6%                   | 93.1%   80.0%            |
|        | Forest     | 287   444   | 4.2%   10.8%          | 25.1%   22.8%                  | 70.7%   66.4%            |
|        | Total      | 4466   6849 | 0.9%   1.3%           | 4.4%   17.3%                   | 94.7%   81.4%            |

Prec., percentage of meteorological stations; N, number of meteorological stations;  $R^2$ , determination coefficient; Total, the maximum predicted  $R^2$  for each meteorological station was selected for counting under 9 categories.

**Table S6.** Carbon-water flux datasets used for comparison with the results of this study.

| Dataset | Variable  | SR   | TR      | Data source                                                                                                                                             |
|---------|-----------|------|---------|---------------------------------------------------------------------------------------------------------------------------------------------------------|
| FLUXCOM | NEE       | 0.5° | Monthly | NEE.RF.CRUNCEPv6 <sup>8</sup><br>( <a href="http://www.fluxcom.org/CF-Download/">http://www.fluxcom.org/CF-Download/</a> )                              |
|         | LE        | 0.5° | Monthly | LE.RS_METEO.EBC-ALL.MLM-ALL.METEO-ALL.720_360 <sup>9</sup><br>( <a href="http://www.fluxcom.org/EF-Download/">http://www.fluxcom.org/EF-Download/</a> ) |
| GOSAT   | BIOSPHERE | 1°   | Monthly | GOSAT L4A                                                                                                                                               |
|         | FLUX      |      |         | ( <a href="https://data2.gosat.nies.go.jp/">https://data2.gosat.nies.go.jp/</a> )                                                                       |
| MODIS   | LE        | 500m | 8-Day   | MOD16A2 Version 6 <sup>10</sup><br>( <a href="https://doi.org/10.5067/MODIS/MOD16A2.006">https://doi.org/10.5067/MODIS/MOD16A2.006</a> )                |

SR, spatial resolution; TR, temporal resolution; NEE, net ecosystem carbon dioxide exchange; LE, latent heat flux; BIOSPHERE FLUX, representing surface carbon flux in terrestrial ecosystems.

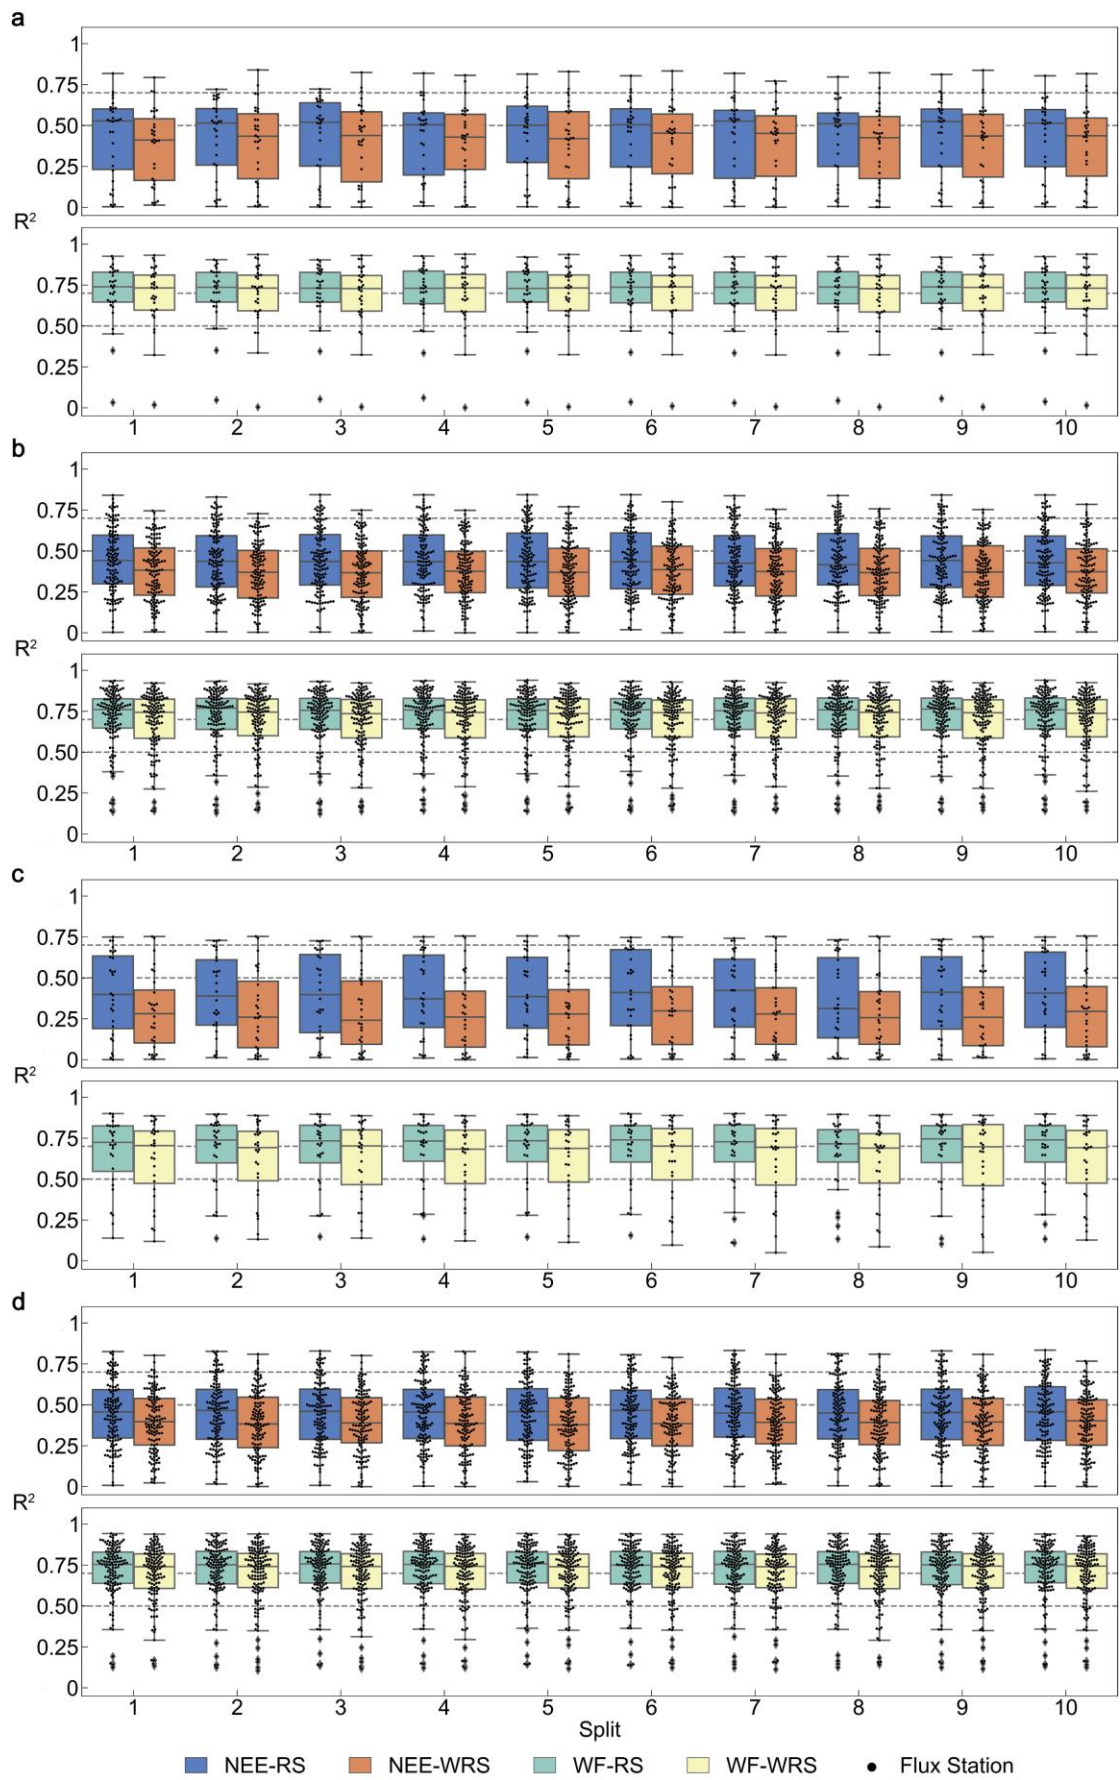

**Fig. S1** The accuracy performance of the carbon-water flux simulation models (random forest

models, RFM) at test flux stations. NEE (net ecosystem carbon dioxide exchange) and WF (water flux)  $R^2$ -based accuracy performance of RFM in each split of the 10-time 10-fold cross-validation for (a) Asia with 30 stations, (b) Europe with 126 stations, (c) Arid with 28 stations and (d) Non-arid with 128 stations. Box plots show the  $R^2$  distribution of each flux station of the test set for different categories, in which the whiskers indicate the 1.5 times' interquartile range.

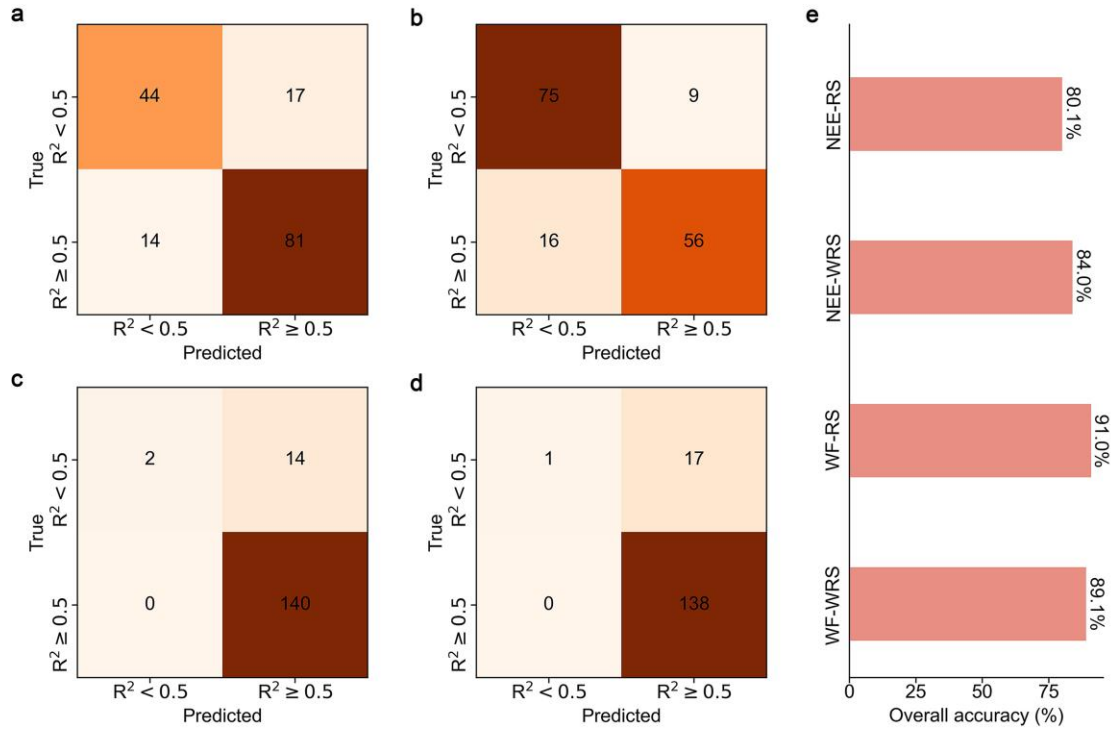

**Fig. S2** Simulation accuracy of  $R^2$  simulation model (RSM) at 156 test flux stations for (a) NEE-RS, (b) NEE-WRS, (c) WF-RS and (d) WF-WRS. Confusion matrixes showed the classification accuracy of RSMs through the true  $R^2$  (tested by carbon-water flux simulation models) and predicted  $R^2$  (predicted by the RSM) of test flux stations. (e) The overall accuracies of the RSM for a correct classification of  $R^2$  for the NEE-RS, NEE-WRS, WF-RS and WF-WRS.

| ID  | $R^2$ | $d_1$ | $d_2$ | ... | $d_{w-1}$ | $d_w$ |
|-----|-------|-------|-------|-----|-----------|-------|
| 1   |       |       |       |     |           |       |
| 2   |       |       |       |     |           |       |
| ... |       |       |       |     |           |       |

**Fig. S3** Database structure of  $R^2$  values of test flux stations and Euclidean distances of its influencing factors between test flux stations and training sets of RFM.



## References

1. Tang, W. Dataset of high-resolution (3 hour, 10 km) global surface solar radiation (1983-2018). *National Tibetan Plateau Data Center* <https://cstr.cn/18406.11.Meteoro.tpdc.270112> (2019).
2. Tang, W., Yang, K., Qin, J., Li, X. & Niu, X. A 16-year dataset (2000-2015) of high-resolution (3 h, 10 km) global surface solar radiation. *Earth Syst. Sci. Data* **11**, 1905–1915 (2019).
3. Liang, S., *et al.* The global land surface satellite (GLASS) product suite. *Bull. Amer. Meteorol. Soc.* **102**, 1-37 (2020).
4. Myneni, R., Knyazikhin, Y. & Park, T. MCD15A3H MODIS/Terra+Aqua Leaf Area Index/FPAR 4-day L4 Global 500m SIN Grid V006. *NASA EOSDIS Land Processes DAAC* <https://doi.org/10.5067/MODIS/MCD15A3H.006> (2015).
5. Vermote, E. & Wolfe, R. MOD09GA MODIS/Terra Surface Reflectance Daily L2G Global 1kmmand 500m SIN Grid V006. *NASA EOSDIS Land Processes DAAC* <https://doi.org/10.5067/MODIS/MOD09GA.006> (2015).
6. Yamazaki, D., *et al.* A high-accuracy map of global terrain elevations. *Geophys. Res. Lett.* **44**, 5844–5853 (2017).
7. FAO/IIASA/ISRIC/ISSCAS/JRC. Harmonized World Soil Database (version 1.2). *FAO, Rome, Italy and IIASA, Laxenburg, Austria* <https://webarchive.iiasa.ac.at/Research/LUC/External-World-soil-database/HTML> (2012).
8. Jung, M., *et al.* Scaling carbon fluxes from eddy covariance sites to globe: Synthesis and evaluation of the FLUXCOM approach. *Biogeosciences* **17**, 1343-1365 (2020).
9. Jung, M., *et al.* The FLUXCOM ensemble of global land-atmosphere energy fluxes. *Sci. Data* **6**, 1-14 (2019).
10. Running, S., Mu, Q. & Zhao, M. MOD16A2 MODIS/Terra Net Evapotranspiration 8-Day L4 Global 500m SIN Grid V006. *NASA EOSDIS Land Processes DAAC* <https://doi.org/10.5067/MODIS/MOD16A2.006> (2017).
